# Supplementary material for: Tspan5 is an independent favourable prognostic factor and suppresses tumour growth in gastric cancer
Source: PubMed Central journal article supplement (PMC5130000; doi:10.18632/oncotarget.9514), 2016-05-20
Supplement: oncotarget-07-40160-s001.pdf [file oncotarget-07-40160-s001.pdf]

## Tspan5 is an independent favourable prognostic factor and suppresses tumour growth in gastric cancer

### SUPPLEMENTARY FIGURE

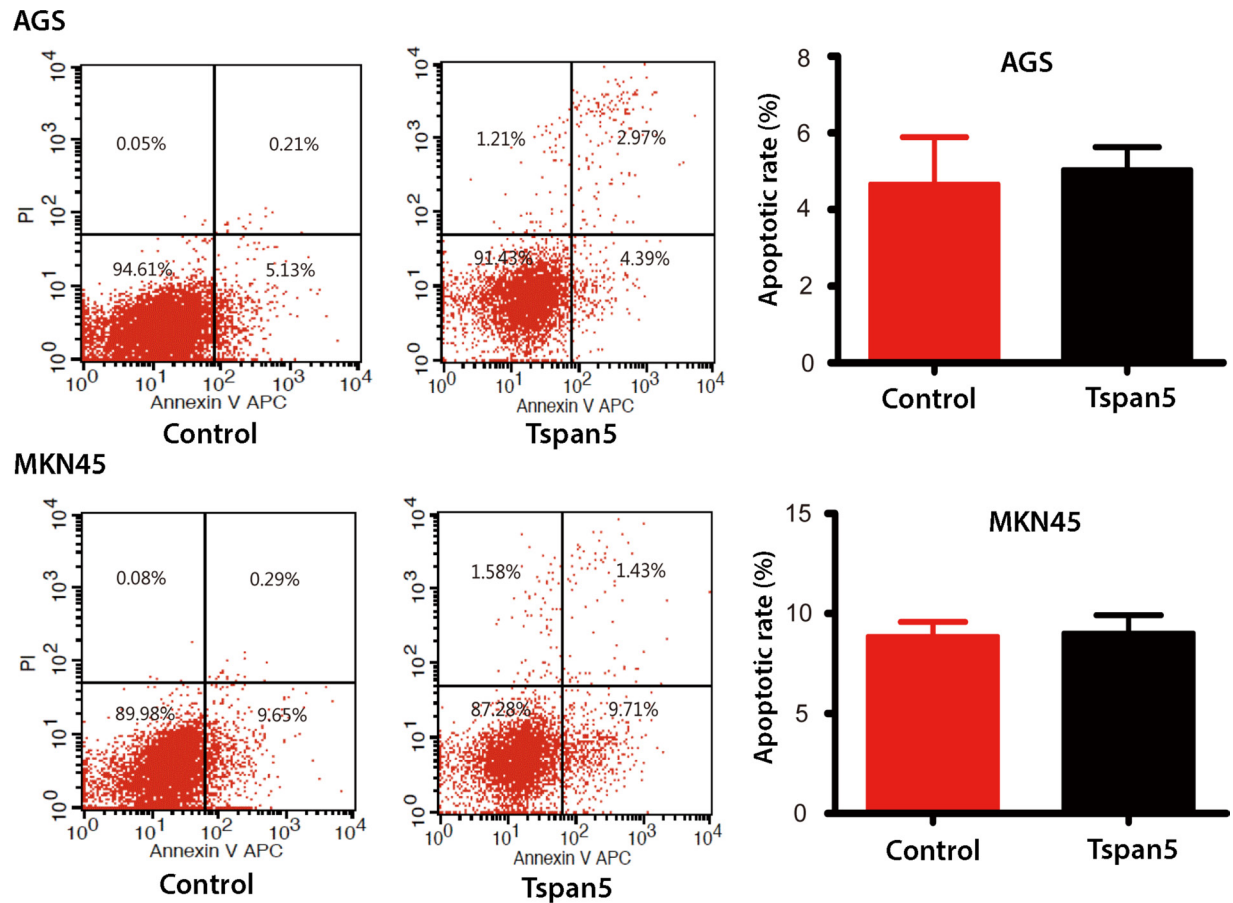

**Supplementary Figure S1: Tspan5 did not affect the apoptosis of GC cells.** Annexin V-APC and PI labeling apoptosis assays showed no significant difference for the percentage of apoptotic cells between Tspan5-overexpressing GC cells and the control cells of either AGS (upper panels: Student's t-test,  $P=0.521$ ) or MKN45 (lower panels: Student's t-test,  $P=0.812$ ).
